# Supplementary material
Source: PubMed Central journal article supplement (PMC6740186)
Supplement: ez9b00394_si_001.pdf [file ez9b00394_si_001.pdf]

## Supporting Information

### Organophosphorus Flame Retardants and Plasticizers in Breast Milk from the United States

**Jing Ma<sup>†,‡</sup>, Hongkai Zhu<sup>†</sup>, Kurunthachalam Kannan<sup>\*,†,§</sup>**

<sup>†</sup> Wadsworth Center, New York State Department of Health, Albany, New York 12201, United States

<sup>‡</sup> School of Environmental and Chemical Engineering, Shanghai University, Shanghai 200444, China

<sup>§</sup> Department of Environmental Health Sciences, School of Public Health, State University of New York at Albany, Albany, NY 12201, United States

\* Corresponding author:

Kurunthachalam Kannan

Tel: 518-474-0015;

Fax: 518-473-2895;

Email: [kurunthachalam.kannan@health.ny.gov](mailto:kurunthachalam.kannan@health.ny.gov)

*Number of pages: 11*

*Number of tables: 6*

*Number of figures: 1*

### **The method for extraction and instrumental analysis**

Fourteen triester OPEs were analyzed; triethyl phosphate (TEP), tripropyl phosphate (TPP), tri-*n*-butyl phosphate (TNBP), tris(2-butoxyethyl) phosphate (TBOEP), tris(2-ethylhexyl) phosphate (TEHP), tris(2-chloroethyl) phosphate (TCEP), tris(2-chloroisopropyl) phosphate (TCIPP), triphenyl phosphate (TPHP), trimethylphenyl phosphate (TMPP), cresyl diphenyl phosphate (CDPP), and isodecyl diphenyl phosphate (IDDP) were purchased from AccuStandard (New Haven, CT, US). Trimethyl phosphate (TMP), tri-*iso*-butyl phosphate (TIBP), and 2-ethylhexyl diphenyl phosphate (EHDPP) were purchased from Sigma-Aldrich (St. Louis, MO, US). TPP-d<sub>21</sub>, TNBP-d<sub>27</sub>, TCEP-d<sub>12</sub>, TCIPP-d<sub>18</sub>, and TPHP-d<sub>15</sub> were purchased from Cambridge Isotope Laboratories (Tewksbury, MA, US), TMP-d<sub>9</sub> and TEHP-d<sub>51</sub> were purchased from Toronto Research Chemicals (North York, ON, Canada), and TEP-d<sub>15</sub> was purchased from Sigma-Aldrich.

Briefly, 0.5 mL of breast milk was transferred into a polypropylene (PP) tube and spiked with 5 ng each of internal standards (TMP-d<sub>9</sub>, TEP-d<sub>15</sub>, TPP-d<sub>21</sub>, TNBP-d<sub>27</sub>, TEHP-d<sub>51</sub>, TCEP-d<sub>12</sub>, TCIPP-d<sub>18</sub>, TPHP-d<sub>15</sub>). After the addition of 5 mL of 0.5% formic acid in acetonitrile (ACN), the sample was extracted by shaking in an orbital shaker for 2 h, followed by ultrasonication for 30 min. To the extract, 500 mg of anhydrous MgSO<sub>4</sub> was added, vortexed for 1 min, and centrifuged for 10 min at 4500 r/min. Then, the supernatant was transferred into a precleaned PP tube for purification, followed by the addition of d-Solid phase extraction (d-SPE) sorbents (150 mg MgSO<sub>4</sub>, 50 mg primary-second amine (PSA), and 50 mg C<sub>18</sub>). The mixture was vortexed for 1 min and then centrifuged at 4500 r/min for 5 min. The supernatant was transferred into a new PP tube for evaporation under gentle N<sub>2</sub> stream at 30 °C to near dryness, and reconstituted with 200 µL of water/methanol (4:6; v/v) and filtered through a 0.2 µm nylon centrifuge tube filter (Corning, Salt Lake City, UT, US) at 10000 r/min for 1 min, and then transferred into a glass vial.

The analysis of 14 OPEs was performed using a Shimadzu LC-30 AD Series high performance liquid chromatography (HPLC, Shimadzu Corporation, Kyoto, Japan) coupled to an API 5500 triple quadrupole mass spectrometry system (MS/MS, Applied Biosystems, Foster City, CA, US). The extract was injected onto a Betasil C<sub>18</sub> column (100 mm × 2.1 mm, 5 μm; Thermo, Waltham, MA, US), connected to a Betasil C<sub>18</sub> guard column (20 mm × 2.1 mm, 5 μm; Thermo). The mobile phase consisted of HPLC-grade water with 0.1% formic acid (v/v) (A) and methanol with 0.1% formic acid (v/v) (B), at a flow rate of 200 μL/min. The gradient flow started at 40:60 A/B that was held for 2 min, then decreased linearly to 1:99 A/B over 5.5 min, held for 9.5 min, before reversing to 40:60 A/B within 0.5 min, and equilibrated for 7.5 min. Multiple reaction monitoring (MRM) mode was used for quantitative determination of 14 OPEs and 8 internal standards, and the MRM transitions are shown in Table S2.

**Table S1** Demographic characteristics of participants (n = 100)

|                                        |                             | N (%)    |
|----------------------------------------|-----------------------------|----------|
| <b>Maternal characteristics</b>        |                             |          |
| Maternal age (years)                   | 16 – 26                     | 26 (26%) |
|                                        | 27 – 33                     | 50 (50%) |
|                                        | 34 – 44                     | 24 (24%) |
| Parity                                 | Primipara                   | 86 (86%) |
|                                        | Multipara                   | 14 (14%) |
| Maternal education (years completed)   | less than high school       | 13 (14%) |
|                                        | High school or some college | 66 (72%) |
|                                        | College or higher           | 13 (14%) |
|                                        | Missing                     | 8        |
| Pre-pregnancy BMI (kg/m <sup>2</sup> ) | Underweight (< 18.5)        | 2 (2%)   |
|                                        | Normal (18.5 – 24.9)        | 52 (60%) |
|                                        | Overweight (25 – 29.9)      | 17 (20%) |
|                                        | Obese (≥ 30)                | 15 (18%) |
|                                        | Missing                     | 14       |
| Family income                          | < \$49,999                  | 39 (44%) |
|                                        | \$49,999 – \$99,999         | 28 (31%) |
|                                        | > \$99,999                  | 22 (25%) |
|                                        | Missing                     | 11       |
| Ethnicity                              | Hispanic                    | 10 (10%) |
|                                        | Non-Hispanic                | 90 (90%) |
| Race                                   | White                       | 77 (77%) |
|                                        | Non-white                   | 23 (23%) |
| Geographic areas                       | West                        | 11 (11%) |
|                                        | Middle                      | 51 (51%) |
|                                        | East                        | 38 (38%) |
| <b>Child characteristics</b>           |                             |          |
| Sex                                    | Boy                         | 50 (50%) |
|                                        | Girl                        | 50 (50%) |
| Preterm (< 37 weeks gestation)         | No                          | 89 (92%) |
|                                        | Yes                         | 8 (8%)   |
|                                        | Missing                     | 3        |
| Birth weight                           | < 3000 g                    | 17 (21%) |
|                                        | 3000 – 3999 g               | 53 (65%) |
|                                        | > 4000 g                    | 12 (14%) |
|                                        | Missing                     | 18       |
| Season of birth                        | Winter (Dec – Feb)          | 23 (23%) |
|                                        | Spring (Mar – May)          | 37 (37%) |
|                                        | Summer (Jun – Aug)          | 29 (29%) |
|                                        | Fall (Sep – Nov)            | 11 (11%) |
|                                        | Mean                        | ± SD     |
| Maternal age                           | 29.8                        | ± 4.99   |
| Maternal BMI (kg/m <sup>2</sup> )      | 25.2                        | ± 5.74   |
| Birth of weight (g)                    | 3356                        | ± 556    |
| Birth of height (cm)                   | 51.3                        | ± 3.06   |

SD: standard deviation.

BMI: body mass index.

**Table S2** Chemical properties and MS/MS parameters of target OPE compounds

| Name                              | Abbreviation | CAS NO.    | Formula                                                         | Molecular Weight | Quantitative transition | Declustering Potential | Collision Energy | Collision Cell Exit Potential | Retention Time (min) |       |
|-----------------------------------|--------------|------------|-----------------------------------------------------------------|------------------|-------------------------|------------------------|------------------|-------------------------------|----------------------|-------|
| Tri-n-butyl phosphate             | TNBP         | 126-73-8   | C <sub>12</sub> H <sub>27</sub> O <sub>4</sub> P                | 266.31           | 267.1                   | 99                     | 31               | 22                            | 14                   | 8.00  |
| Tri-iso-butyl phosphate           | TIBP         | 126-71-6   | C <sub>12</sub> H <sub>27</sub> O <sub>4</sub> P                | 266.32           | 267.1                   | 99                     | 31               | 22                            | 14                   | 7.90  |
| Trimethylphenyl phosphate         | TMPP         | 1330-78-5  | C <sub>21</sub> H <sub>21</sub> O <sub>4</sub> P                | 368.36           | 369.1                   | 166.1                  | 70               | 50                            | 15                   | 8.71  |
| Triethyl phosphate                | TEP          | 78-40-0    | C <sub>6</sub> H <sub>15</sub> O <sub>4</sub> P                 | 182.15           | 183                     | 99                     | 30               | 20                            | 12                   | 2.34  |
| Triphenyl phosphate               | TPHP         | 115-86-6   | C <sub>18</sub> H <sub>15</sub> O <sub>4</sub> P                | 326.28           | 327.1                   | 77                     | 110              | 46                            | 19                   | 7.35  |
| Tripropyl phosphate               | TPP          | 513-08-6   | C <sub>9</sub> H <sub>21</sub> O <sub>4</sub> P                 | 224.23           | 225.1                   | 99                     | 30               | 15                            | 15                   | 6.02  |
| Tris(2-butoxyethyl) phosphate     | TBOEP        | 78-51-3    | C <sub>18</sub> H <sub>39</sub> O <sub>7</sub> P                | 398.47           | 399.1                   | 199                    | 65               | 16                            | 16                   | 8.23  |
| Tris(2-chloroethyl) phosphate     | TCEP         | 115-96-8   | C <sub>6</sub> H <sub>12</sub> Cl <sub>3</sub> O <sub>4</sub> P | 285.49           | 284.9                   | 63.1                   | 30               | 50                            | 8                    | 3.04  |
| Tris(2-chloroisopropyl) phosphate | TCIPP        | 13674-84-5 | C <sub>9</sub> H <sub>18</sub> Cl <sub>3</sub> O <sub>4</sub> P | 327.57           | 327.1                   | 99                     | 40               | 35                            | 17                   | 6.10  |
| Tris(2-ethylhexyl) phosphate      | TEHP         | 78-42-2    | C <sub>24</sub> H <sub>51</sub> O <sub>4</sub> P                | 434.63           | 435.4                   | 99                     | 20               | 30                            | 12                   | 12.38 |
| 2-Ethylhexyl diphenyl phosphate   | EHDPP        | 1241-94-7  | C <sub>20</sub> H <sub>27</sub> O <sub>4</sub> P                | 362.4            | 363.2                   | 251                    | 14               | 13                            | 35                   | 8.99  |
| Isodecyl diphenyl phosphate       | IDDP         | 29761-21-5 | C <sub>22</sub> H <sub>31</sub> O <sub>4</sub> P                | 390.4            | 391                     | 250.9                  | 16               | 18                            | 37                   | 9.56  |
| Cresyl diphenyl phosphate         | CDPP         | 26444-49-5 | C <sub>19</sub> H <sub>17</sub> O <sub>4</sub> P                | 340.3            | 341.1                   | 152                    | 35               | 50                            | 18                   | 7.84  |
| Trimethyl phosphate               | TMP          | 512-56-1   | C <sub>3</sub> H <sub>9</sub> O <sub>4</sub> P                  | 140.8            | 141                     | 108.9                  | 30               | 25                            | 12                   | 1.32  |

**Table S3** Instrumental performance, matrix spiked recoveries, procedure blanks, limit of quantitation (ng/mL)

| Analytes | IS                    | % IS recovery | % Matrix spike recovery (n=10) |          |          | Liner/R | Procedure blanks | LOB    | LOD   | LOQ   |
|----------|-----------------------|---------------|--------------------------------|----------|----------|---------|------------------|--------|-------|-------|
|          |                       |               | 1 ng/g                         | 5 ng/g   | Mean     |         |                  |        |       |       |
| TNBP     | TNBP-d <sub>27</sub>  | 45 ± 29       | 114 ± 27                       | 91 ± 5   | 103 ± 22 | 0.9994  | 0.1841 ± 0.0355  | 0.2425 | 0.301 | 0.301 |
| TIBP     | TNBP-d <sub>27</sub>  |               | 109 ± 19                       | 115 ± 8  | 112 ± 15 | 0.9990  | 0.1761 ± 0.0301  | 0.2256 | 0.275 | 0.275 |
| TMPP     | TPHP-d <sub>15</sub>  |               | 81 ± 12                        | 99 ± 15  | 90 ± 16  | 0.9999  | 0.0021 ± 0.0023  | 0.0059 | 0.010 | 0.010 |
| TEP      | TEP-d <sub>15</sub>   | 65 ± 15       | 113 ± 23                       | 107 ± 13 | 110 ± 18 | 0.9999  | 0.1537 ± 0.0608  | 0.2537 | 0.354 | 0.354 |
| TPHP     | TPHP-d <sub>15</sub>  | 42 ± 29       | 107 ± 16                       | 109 ± 13 | 108 ± 14 | 0.9996  | 0.0318 ± 0.0234  | 0.0703 | 0.109 | 0.109 |
| TPP      | TPP-d <sub>21</sub>   | 63 ± 17       | 68 ± 10                        | 69 ± 4   | 68 ± 8   | 0.9997  | ND               |        | 0.007 | 0.023 |
| TBOEP    | TNBP-d <sub>27</sub>  |               | 104 ± 35                       | 104 ± 14 | 104 ± 26 | 0.9998  | 0.0119 ± 0.0311  | 0.0630 | 0.114 | 0.114 |
| TCEP     | TCEP-d <sub>12</sub>  | 70 ± 16       | 111 ± 5                        | 104 ± 4  | 108 ± 5  | 0.9996  | 0.0023 ± 0.0025  | 0.0063 | 0.010 | 0.026 |
| TCIPP    | TCIPP-d <sub>18</sub> | 57 ± 22       | 91 ± 23                        | 91 ± 19  | 91 ± 21  | 0.9999  | 0.1276 ± 0.0796  | 0.2586 | 0.390 | 0.390 |
| TEHP     | TEHP-d <sub>51</sub>  | 10 ± 25       | 93 ± 16                        | 91 ± 17  | 92 ± 16  | 0.9997  | 0.0578 ± 0.0603  | 0.1570 | 0.256 | 0.256 |
| EHDPP    | TPHP-d <sub>15</sub>  |               | 69 ± 6                         | 61 ± 8   | 65 ± 8   | 0.9997  | 0.0023 ± 0.0025  | 0.0064 | 0.010 | 0.010 |
| IDDP     | TPHP-d <sub>15</sub>  |               | 54 ± 6                         | 49 ± 5   | 51 ± 6   | 0.9997  | 0.0047 ± 0.0056  | 0.0138 | 0.023 | 0.023 |
| CDPP     | TPHP-d <sub>15</sub>  |               | 96 ± 11                        | 95 ± 4   | 96 ± 8   | 0.9993  | 0.0005 ± 0.0015  | 0.0029 | 0.005 | 0.005 |
| TMP      | TMP-d <sub>6</sub>    | 46 ± 22       | 105 ± 7                        | 98 ± 4   | 101 ± 6  | 0.9985  | ND               |        | 0.050 | 0.166 |

IS: internal standard, average recoveries ± standard deviation (SD)

LOB: limit of blank,  $LOB = \text{mean}_{\text{blank}} + 1.645 (SD_{\text{blank}})^1$

LOD: limit of detection,  $LOD = LOB + 1.645 (SD_{\text{blank}})$  if compounds present in the blanks;  $LOD = 3 \text{ signal/noise (S/N)}$  if compounds not present in the blanks.

LOQ: limit of quantitation,  $LOQ = LOD$  if compounds present in the blanks;  $LOQ = 10 \text{ S/N}$  if compounds not present in the blanks.

**Table S4** Spearman's rank correlation coefficient between concentrations of TNBP, TIBP, TMPP, and TBOEP in human breast milk samples from the US

|       | TNBP | TIBP    | TMPP    | TBOEP   |
|-------|------|---------|---------|---------|
| TNBP  | 1    | 0.762** | 0.341** | 0.487** |
| TIBP  |      | 1       | 0.393** | 0.510** |
| TMPP  |      |         | 1       | 0.524** |
| TBOEP |      |         |         | 1       |

\*\*  $p < 0.01$  (two-tailed).

**Table S5 National Aggregation Production Volume\* (PV, Lbs) in the United States**

| Chemical | Chemical ID | 2015 Aggregate PV        | 2014 Aggregate PV        | 2013 Aggregate PV       | 2012 Aggregate PV       |
|----------|-------------|--------------------------|--------------------------|-------------------------|-------------------------|
| TNBP     | 126-73-8    | 1,000,000 – 10,000,000   | 10,000,000 – 50,000,000  | 1,000,000 – 10,000,000  | 1,000,000 - 10,000,000  |
| TIBP     | 126-71-6    | withheld                 | withheld                 | withheld                | withheld                |
| TMPP     | 1330-78-5   | 1,000,000 – 10,000,000   | 1,000,000 – 10,000,000   | 1,000,000 – 10,000,000  | 1,000,000 - 10,000,000  |
| TEP      | 78-40-0     | 1,000,000 – 10,000,000   | 1,000,000 – 10,000,000   | 1,000,000 – 10,000,000  | 1,000,000 - 10,000,000  |
| TPHP     | 115-86-6    | 1,000,000 – 10,000,000   | 10,000,000 – 50,000,000  | 1,000,000 – 10,000,000  | 1,000,000 - 10,000,000  |
| TPP      | 513-08-6    | –                        | –                        | –                       | –                       |
| TBOEP    | 78-51-3     | 1,000,000 – 10,000,000   | 1,000,000 – 10,000,000   | 1,000,000 – 10,000,000  | 1,000,000 - 10,000,000  |
| TCEP     | 115-96-8    | 25,000 – 100,000         | 100,000 – 500,000        | 25,000 – 100,000        | 25,000 - 100,000        |
| TCIPP    | 13674-84-5  | 50,000,000 – 100,000,000 | 50,000,000 – 100,000,000 | 10,000,000 – 50,000,000 | 10,000,000 - 50,000,000 |
| TEHP     | 78-42-2     | 1,000,000 – 10,000,000   | 1,000,000 – 10,000,000   | 1,000,000 – 10,000,000  | 1,000,000 - 10,000,000  |
| EHDPP    | 1241-94-7   | 1,000,000 – 10,000,000   | 1,000,000 – 10,000,000   | 1,000,000 – 10,000,000  | 1,000,000 - 10,000,000  |
| IDDP     | 29761-21-5  | withheld                 | withheld                 | withheld                | withheld                |
| CDPP     | 26444-49-5  | 100,000 – 500,000        | 100,000 – 500,000        | 100,000 – 500,000       | 25,000 - 100,000        |
| TMP      | 512-56-1    | 100,000 – 500,000        | 100,000 – 500,000        | 25,000 – 100,000        | 25,000 - 100,000        |

\* Production volume were cited from 2016 Chemical Data Reporting Results <sup>2</sup>.

“–” not available.

**Table S6** Comparison of concentrations of TNBP, TIBP, TMPP, and TBOEP (ng/mL) in human breast milk samples from the US with various demographic factors

|                                                         | N  | TNBP            |        |                 |       | TIBP  |        |       |       | TMPP  |        |       |       | TBOEP |        |       |              |
|---------------------------------------------------------|----|-----------------|--------|-----------------|-------|-------|--------|-------|-------|-------|--------|-------|-------|-------|--------|-------|--------------|
|                                                         |    | AM <sup>a</sup> | Median | GM <sup>b</sup> | P*    | AM    | Median | GM    | P     | AM    | Median | GM    | P     | AM    | Median | GM    | P            |
| <b>Maternal characteristics</b>                         |    |                 |        |                 |       |       |        |       |       |       |        |       |       |       |        |       |              |
| <i>Maternal age (years)</i>                             |    |                 |        |                 |       |       |        |       |       |       |        |       |       |       |        |       |              |
| 16 – 26                                                 | 26 | 0.528           | 0.536  | 0.465           | 0.656 | 0.532 | 0.557  | 0.456 | 0.452 | 0.023 | 0.019  | 0.020 | 0.918 | 1.255 | 1.128  | 1.073 | 0.289        |
| 27 – 33                                                 | 50 | 0.562           | 0.537  | 0.492           |       | 0.613 | 0.583  | 0.532 |       | 0.022 | 0.022  | 0.000 |       | 1.557 | 1.501  | 0.000 |              |
| 34 – 44                                                 | 24 | 0.502           | 0.494  | 0.462           |       | 0.518 | 0.514  | 0.472 |       | 0.021 | 0.019  | 0.018 |       | 1.379 | 1.287  | 1.201 |              |
| <i>Parity</i>                                           |    |                 |        |                 |       |       |        |       |       |       |        |       |       |       |        |       |              |
| Primipara                                               | 86 | 0.540           | 0.519  | 0.471           | 0.925 | 0.563 | 0.511  | 0.483 | 0.272 | 0.021 | 0.020  | 0.000 | 0.207 | 1.445 | 1.408  | 0.000 | 0.937        |
| Multipara                                               | 14 | 0.528           | 0.532  | 0.515           |       | 0.610 | 0.602  | 0.587 |       | 0.026 | 0.028  | 0.022 |       | 1.376 | 1.336  | 1.205 |              |
| <i>Maternal education (years completed)</i>             |    |                 |        |                 |       |       |        |       |       |       |        |       |       |       |        |       |              |
| less than high school                                   | 13 | 0.393           | 0.488  | 0.474           | 0.131 | 0.437 | 0.438  | 0.370 | 0.235 | 0.017 | 0.019  | 0.000 | 0.249 | 1.224 | 0.906  | 0.000 | 0.533        |
| High school or some college                             | 66 | 0.570           | 0.430  | 0.353           |       | 0.589 | 0.561  | 0.513 |       | 0.022 | 0.020  | 0.018 |       | 1.492 | 1.488  | 0.000 |              |
| College or higher                                       | 13 | 0.521           | 0.546  | 0.502           |       | 0.618 | 0.606  | 0.589 |       | 0.026 | 0.026  | 0.023 |       | 1.314 | 1.154  | 1.100 |              |
| Missing                                                 | 8  |                 |        |                 |       |       |        |       |       |       |        |       |       |       |        |       |              |
| <i>Pre-pregnancy body mass index (kg/m<sup>2</sup>)</i> |    |                 |        |                 |       |       |        |       |       |       |        |       |       |       |        |       |              |
| Underweight (< 18.5)                                    | 2  | 0.559           | 0.559  | 0.559           | 0.644 | 0.766 | 0.766  | 0.765 | 0.545 | 0.021 | 0.021  | 0.021 | 0.975 | 2.263 | 2.263  | 2.137 | 0.642        |
| Normal (18.5 – 24.9)                                    | 52 | 0.557           | 0.533  | 0.495           |       | 0.591 | 0.575  | 0.514 |       | 0.022 | 0.021  | 0.019 |       | 1.464 | 1.504  | 0.000 |              |
| Overweight (25 – 29.9)                                  | 17 | 0.537           | 0.566  | 0.489           |       | 0.552 | 0.536  | 0.505 |       | 0.024 | 0.018  | 0.019 |       | 1.280 | 1.134  | 1.114 |              |
| Obese (≥ 30)                                            | 15 | 0.513           | 0.480  | 0.437           |       | 0.537 | 0.500  | 0.461 |       | 0.021 | 0.021  | 0.017 |       | 1.491 | 1.214  | 1.123 |              |
| Missing                                                 | 14 |                 |        |                 |       |       |        |       |       |       |        |       |       |       |        |       |              |
| <i>Family income</i>                                    |    |                 |        |                 |       |       |        |       |       |       |        |       |       |       |        |       |              |
| < \$49,999                                              | 39 | 0.471           | 0.480  | 0.441           | 0.142 | 0.535 | 0.520  | 0.466 | 0.294 | 0.020 | 0.019  | 0.017 | 0.684 | 1.332 | 1.214  | 1.150 | 0.165        |
| \$49,999 – \$99,999                                     | 28 | 0.600           | 0.552  | 0.529           |       | 0.645 | 0.601  | 0.567 |       | 0.024 | 0.022  | 0.021 |       | 1.756 | 1.708  | 1.431 |              |
| > \$99,999                                              | 22 | 0.545           | 0.569  | 0.485           |       | 0.577 | 0.602  | 0.513 |       | 0.023 | 0.021  | 0.018 |       | 1.268 | 1.100  | 0.000 |              |
| Missing                                                 | 11 |                 |        |                 |       |       |        |       |       |       |        |       |       |       |        |       |              |
| <i>Ethnicity</i>                                        |    |                 |        |                 |       |       |        |       |       |       |        |       |       |       |        |       |              |
| Hispanic                                                | 10 | 0.426           | 0.445  | 0.361           | 0.162 | 0.512 | 0.464  | 0.453 | 0.490 | 0.019 | 0.020  | 0.000 | 0.508 | 0.956 | 0.765  | 0.000 | <b>0.041</b> |
| Non-Hispanic                                            | 90 | 0.551           | 0.537  | 0.492           |       | 0.575 | 0.560  | 0.502 |       | 0.022 | 0.021  | 0.019 |       | 1.489 | 1.477  | 0.000 |              |
| <i>Race</i>                                             |    |                 |        |                 |       |       |        |       |       |       |        |       |       |       |        |       |              |
| White                                                   | 77 | 0.544           | 0.532  | 0.483           | 0.749 | 0.565 | 0.560  | 0.493 | 0.822 | 0.021 | 0.019  | 0.000 | 0.216 | 1.451 | 1.422  | 0.000 | 0.575        |
| Non-white                                               | 23 | 0.522           | 0.504  | 0.459           |       | 0.582 | 0.522  | 0.508 |       | 0.024 | 0.024  | 0.020 |       | 1.384 | 1.122  | 1.104 |              |
| <i>Geographic areas</i>                                 |    |                 |        |                 |       |       |        |       |       |       |        |       |       |       |        |       |              |
| West                                                    | 11 | 0.594           | 0.576  | 0.568           | 0.057 | 0.618 | 0.600  | 0.562 | 0.135 | 0.022 | 0.019  | 0.021 | 0.437 | 1.465 | 1.142  | 1.228 | 0.575        |
| Middle                                                  | 51 | 0.574           | 0.544  | 0.509           |       | 0.606 | 0.598  | 0.525 |       | 0.023 | 0.022  | 0.019 |       | 1.476 | 1.518  | 0.000 |              |
| East                                                    | 38 | 0.475           | 0.460  | 0.416           |       | 0.506 | 0.479  | 0.445 |       | 0.020 | 0.020  | 0.000 |       | 1.374 | 1.220  | 0.000 |              |
| <b>Child characteristics</b>                            |    |                 |        |                 |       |       |        |       |       |       |        |       |       |       |        |       |              |
| <i>Sex</i>                                              |    |                 |        |                 |       |       |        |       |       |       |        |       |       |       |        |       |              |
| Boy                                                     | 50 | 0.502           | 0.507  | 0.457           | 0.280 | 0.539 | 0.504  | 0.477 | 0.265 | 0.021 | 0.020  | 0.000 | 0.452 | 1.402 | 1.408  | 0.000 | 0.600        |
| Girl                                                    | 50 | 0.575           | 0.538  | 0.498           |       | 0.599 | 0.576  | 0.517 |       | 0.023 | 0.021  | 0.019 |       | 1.469 | 1.350  | 0.000 |              |
| <i>Preterm (&lt; 37 weeks gestation)</i>                |    |                 |        |                 |       |       |        |       |       |       |        |       |       |       |        |       |              |
| No                                                      | 89 | 0.535           | 0.522  | 0.471           | 0.635 | 0.569 | 0.554  | 0.491 | 0.186 | 0.022 | 0.020  | 0.000 | 0.757 | 1.464 | 1.474  | 0.000 | 0.189        |
| Yes                                                     | 8  | 0.561           | 0.458  | 0.516           |       | 0.501 | 0.441  | 0.476 |       | 0.023 | 0.024  | 0.021 |       | 1.387 | 1.324  | 1.200 |              |
| Missing                                                 | 3  |                 |        |                 |       |       |        |       |       |       |        |       |       |       |        |       |              |
| <i>Birth weight</i>                                     |    |                 |        |                 |       |       |        |       |       |       |        |       |       |       |        |       |              |
| < 3000 g                                                | 17 | 0.526           | 0.544  | 0.460           | 0.866 | 0.603 | 0.650  | 0.529 | 0.776 | 0.021 | 0.018  | 0.018 | 0.659 | 1.320 | 1.214  | 1.086 | 0.749        |
| 3000 – 3999 g                                           | 53 | 0.546           | 0.542  | 0.482           |       | 0.553 | 0.532  | 0.479 |       | 0.023 | 0.021  | 0.000 |       | 1.454 | 1.394  | 0.000 |              |
| > 4000 g                                                | 12 | 0.492           | 0.470  | 0.429           |       | 0.527 | 0.548  | 0.453 |       | 0.019 | 0.019  | 0.016 |       | 1.231 | 1.108  | 0.000 |              |
| Missing                                                 | 18 |                 |        |                 |       |       |        |       |       |       |        |       |       |       |        |       |              |



| <i>Season of birth</i> |    |       |       |       |       |       |       |       |       |       |       |       |       |       |       |       |       |
|------------------------|----|-------|-------|-------|-------|-------|-------|-------|-------|-------|-------|-------|-------|-------|-------|-------|-------|
| Winter (Dec – Feb)     | 23 | 0.545 | 0.542 | 0.467 | 0.399 | 0.557 | 0.500 | 0.479 | 0.320 | 0.021 | 0.022 | 0.018 | 0.694 | 1.489 | 1.506 | 0.000 | 0.317 |
| Spring (Mar – May)     | 37 | 0.576 | 0.544 | 0.506 |       | 0.611 | 0.642 | 0.538 |       | 0.025 | 0.022 | 0.020 |       | 1.594 | 1.520 | 1.396 |       |
| Summer (Jun – Aug)     | 29 | 0.516 | 0.478 | 0.467 |       | 0.532 | 0.466 | 0.453 |       | 0.021 | 0.019 | 0.017 |       | 1.285 | 1.348 | 1.013 |       |
| Fall (Sep – Nov)       | 11 | 0.459 | 0.480 | 0.433 |       | 0.552 | 0.508 | 0.524 |       | 0.018 | 0.020 | 0.000 |       | 1.188 | 1.134 | 0.000 |       |

<sup>a</sup> AM: arithmetic mean.

<sup>b</sup> GM: geometric mean.

\* *p* values were obtained from Mann-Whitney *U* test or Kruskal-Wallis H test.

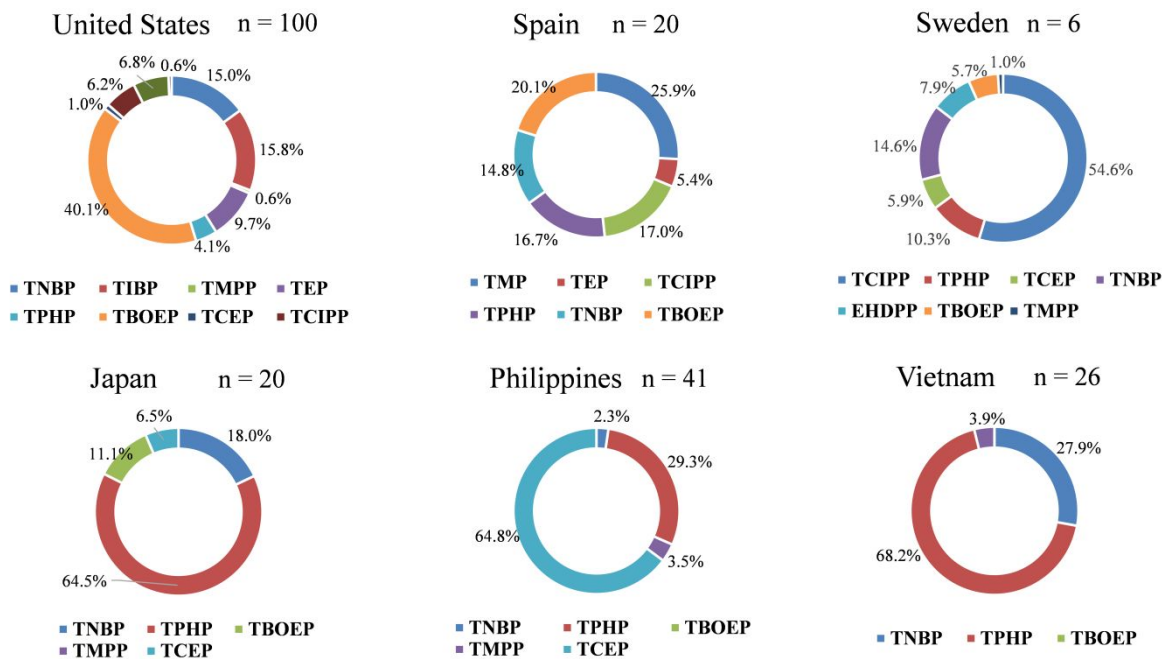

Figure S1. Composition (%) of individual organophosphorus esters (OPEs) to sum concentrations in breast milk from the United States (this study), Sweden <sup>3</sup>, Spain <sup>4</sup>, Japan, Philippines, and Vietnam <sup>5</sup>. Data for individual OPEs are not one-to-one correspondence among different countries.

## References

1. Armbruster, D. A.; Pry, T., Limit of blank, limit of detection and limit of quantitation. *Clin Biochem Rev* **2008**, *29 Suppl 1*, (Suppl 1), S49-S52.
2. EPA, U. S., Chemical Data Access Tool (CDAT). *Chemical Data Reporting (CDR) Results 2016*, US EPA, Washington, DC (dataset).
3. Sundkvist, A. M.; Olofsson, U.; Haglund, P., Organophosphorus flame retardants and plasticizers in marine and fresh water biota and in human milk. *J Environ Monitor* **2010**, *12*, (4), 943-951.
4. Beser, M. I.; Pardo, O.; Beltran, J.; Yusa, V., Determination of 21 perfluoroalkyl substances and organophosphorus compounds in breast milk by liquid chromatography coupled to orbitrap high-resolution mass spectrometry. *Anal Chim Acta* **2019**, *1049*, 123-132.
5. Kim, J. W.; Isobe, T.; Muto, M.; Tue, N. M.; Katsura, K.; Malarvannan, G.; Sudaryanto, A.; Chang, K. H.; Prudente, M.; Viet, P. H.; Takahashi, S.; Tanabe, S., Organophosphorus flame retardants (PFRs) in human breast milk from several Asian countries. *Chemosphere* **2014**, *116*, 91-97.
